# Supplementary material
Source: publisher site journal article supplement (https://www.dovepress.com/article/489893)
Supplement: Supplementary file 1 [file get_supplementary_file.php]

| **Table S1.** The univariate and multivariate model of the SAD predictors. | | | | |
| --- | --- | --- | --- | --- |
| **Characteristic** | **Univariate** | | **Multivariate** | |
| **OR** (95% CI) | ***P*-value** | **OR** (95% CI) | ***P*-value** |
| **Age (Years)** | 1.0 (0.99 to 1.00) | 0.15 | 1.00 (0.99 to 1.00) | 0.36 |
| **Sex** |  | 0.006 |  | 0.015 |
| Female | — |  | — |  |
| Male | 1.44 (1.11 to 1.86) |  | 1.39 (1.07 to 1.81) |  |
| **BMI** | 0.98 (0.97 to 1.00) | 0.076 | 0.99 (0.97 to 1.00) | 0.12 |
| **Smoking Status** |  | <0.001 |  | <0.001 |
| Never Smoker | — |  | — |  |
| Previous Smoker | 1.10 (0.81 to 1.48) |  | 1.09 (0.80 to 1.48) |  |
| Current Smoker | 2.06 (1.45 to 2.94) |  | 2.05 (1.43 to 2.93) |  |
| **Abbreviations**: SAD: small airways dysfunction, BMI: body mass index, OR: odds ratio. | | | | |

| **Table S2.** The univariate and multivariate model of the + BDR for FEV1 | | | | |
| --- | --- | --- | --- | --- |
| **Characteristic** | Univariate | | Multivariate | |
| **OR** **(95% CI)** | ***P*-value** | **OR** **(95% CI)** | ***P*-value** |
| **Age (Years)** | 0.97 (0.95 to 0.98) | <0.001 | 0.97 (0.96 to 0.99) | <0.001 |
| **Sex** |  | 0.38 |  |  |
| Female | — |  |  |  |
| Male | 1.27 (0.74 to 2.21) |  |  |  |
| **BMI** | 1.04 (1.00 to 1.08) | 0.066 |  |  |
| **Smoking Status** |  | 0.24 |  |  |
| Never Smoker | — |  |  |  |
| Previous Smoker | 0.61 (0.32 to 1.16) |  |  |  |
| Current Smoker | 1.07 (0.54 to 2.17) |  |  |  |
| **SAD at Baseline** | 4.61 (2.34 to 9.52) | <0.001 | 3.59 (1.77 to 7.57) | <0.001 |
| **AO at Baseline** | 1.74 (0.94 to 3.23) | 0.076 |  |  |
| **Abbreviations**: SAD: small airways dysfunction, AO: airflow obstruction, BMI: body mass index, OR: odds ratio. | | | | |

| **Table S3.** The univariate and multivariate model of the + BDR for MMEF | | | | |
| --- | --- | --- | --- | --- |
| **Characteristic** | **Univariate** | | **Multivariate** | |
| **OR** (95% CI) | ***P*-value** | **OR** (95% CI) | ***P*-value** |
| **Age (Years)** | 0.98 (0.96 to 0.99) | 0.006 | 0.98 (0.96 to 1.00) | 0.041 |
| **Sex** |  | 0.011 |  | 0.020 |
| Female | — |  | — |  |
| Male | 0.45 (0.24 to 0.84) |  | 0.46 (0.24 to 0.89) |  |
| **BMI** | 1.03 (0.99 to 1.09) | 0.15 |  |  |
| **Smoking Status** |  | 0.82 |  |  |
| Never Smoker | — |  |  |  |
| Previous Smoker | 0.84 (0.42 to 1.71) |  |  |  |
| Current Smoker | 1.08 (0.50 to 2.43) |  |  |  |
| **SAD at Baseline** | 3.84 (1.95 to 7.61) | <0.001 | 2.89 (1.41 to 5.95) | 0.004 |
| **AO at Baseline** | 1.14 (0.57 to 2.23) | 0.70 |  |  |
| **Abbreviations**: SAD: small airways dysfunction, AO: airflow obstruction, BMI: body mass index, OR: odds ratio. | | | | |
